# Supplementary material for: Inactivated Sendai Virus (HVJ-E) Immobilized Electrospun Nanofiber for Cancer Therapy
Source: MDPI journal article supplement (doi:10.3390/ma9010012), 2015-12-26
Supplement: s1 [file s1]

# Supplementary Materials: Inactivated Sendai Virus (HVJ-E) Immobilized Electrospun Nanofiber for Cancer Therapy

Takaharu Okada, Eri Niiyama, Koichiro Uto, Takao Aoyagi and Mitsuhiro Ebara

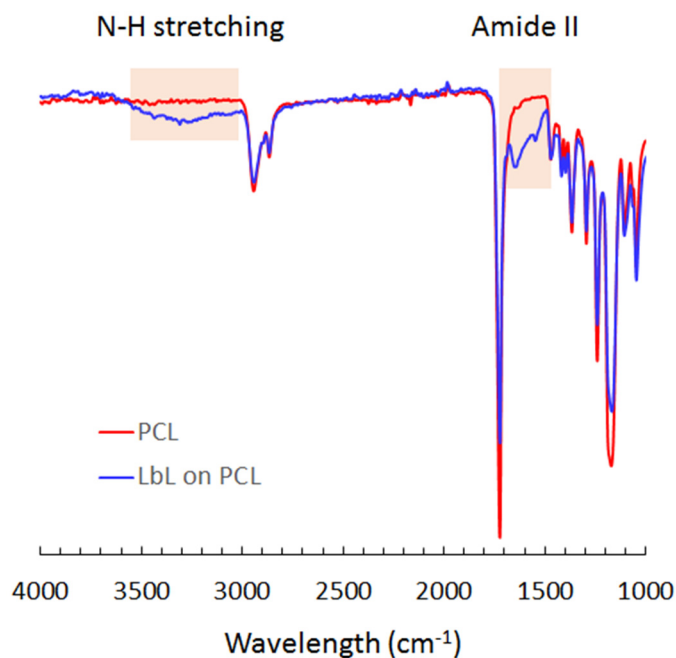

**Figure S1.** FTIR spectrum of bare PCL nanofibers and LbL coated PCL nanofibers were measured for confirming the existence of LbL multilayer on PCL nanofibers, respectively.

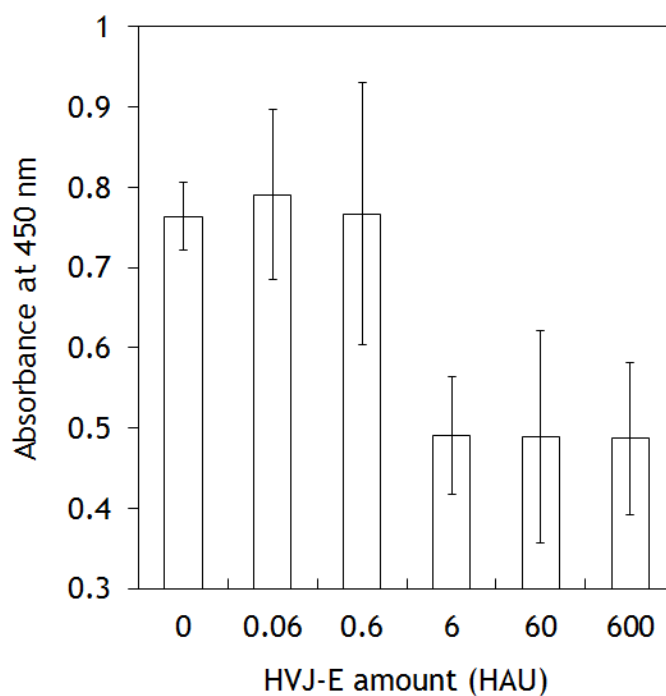

**Figure S2.** The cell cytotoxicity assays for 10,000 cells of PC-3 cells co-cultured with 0.06–600 HAU of HVJ-E for 24 h, respectively. After the co-culture, the 10  $\mu$ L of cell counting kit-8 was added to each wells and incubated for 2 h at 37  $^{\circ}$ C. Then the absorbance at 450 nm of each wells were measured by the UV plate reader.
